# Supplementary material
Source: MDPI journal article supplement (https://www.mdpi.com/2076-3271/10/4/67)
Supplement: s1 [file s1]

## Supplementary files

ICD-10 codes.

Table S1: ICD-10 codes of comorbidities

|                                                                    |                                                                                                         |
|--------------------------------------------------------------------|---------------------------------------------------------------------------------------------------------|
| COVID-19                                                           | U07.1                                                                                                   |
| COVID-19 pneumonia                                                 | U071 & J12.89                                                                                           |
| COVID-19 bronchitis and LRTI                                       | U07.1 & J20.8 or J40 or J22 or J98.8                                                                    |
| COVID-19 ARDS                                                      | U07.1 & J80                                                                                             |
| Asymptomatic COVID-19                                              | U07.1 while excluding the above categories                                                              |
| Asthma                                                             | J45                                                                                                     |
| COPD                                                               | J43, J44, J41, J42                                                                                      |
| Chronic pulmonary disorders                                        | I27.8, I27.9, J40.x – J47.x, J60.x – J67.x, J68.4, J70.1, J70.3                                         |
| Cystic fibrosis                                                    | E84                                                                                                     |
| Other chronic pulmonary disorders                                  | Chronic pulmonary disorders after excluding asthma, COPD and cystic fibrosis                            |
| Stroke                                                             | I67.81, I67.82, I63, G46, I69                                                                           |
| CKD                                                                | N18                                                                                                     |
| Severe IQ disability, iodine deficiency, downs syndrome and autism | F72, F73, E00, Q90, F84                                                                                 |
| ADHD                                                               | F90                                                                                                     |
| Cerebral palsy                                                     | G80                                                                                                     |
| Paralysis                                                          | G81, G82, G83                                                                                           |
| Heart failure                                                      | I50                                                                                                     |
| Cardiomyopathy                                                     | I42,43                                                                                                  |
| Ischemic heart disease                                             | I20, I21, I22, I23, I24, I25                                                                            |
| Mood or psychotic disorders                                        | F28 to F33, F39, F21 to F25                                                                             |
| HIV/AIDS                                                           | B20, Z21                                                                                                |
| Uncomplicated DM                                                   | E10.0, E10.1, E10.9, E11.0, E11.1, E11.9, E12.0, E12.1, E12.9, E13.0, E13.1, E13.9, E14.0, E14.1, E14.9 |
| Complicated DM                                                     | E10.2 - E10.8, E11.2 - E11.8, E12.2 - E12.8, E13.2 - E13.8, E14.2 - E14.8                               |
| Uncomplicated hypertension                                         | I10.x                                                                                                   |
| Complicated hypertension                                           | I11.x - I13.x, I15.x                                                                                    |
| Solid cancer                                                       | C00.x - C26.x, C30.x - C34.x, C37.x - C41.x, C43.x, C45.x - C58.x, C60.x - C76.x, C97.x C77.x - C80.x   |
| Dyslipidemia                                                       | E78.00, E78.01, E78.1, E78.2, E78.3, E78.41, E78.49, E78.5                                              |
| Overweight and obesity                                             | E66                                                                                                     |
| Malnutrition                                                       | E43, E44, E46, D64                                                                                      |
| Primary immunodeficiency                                           | D80 to D84                                                                                              |
| Nicotine abuse                                                     | F17, Z57.31, Z72.0, Z77.22, T65.2                                                                       |
| Sickle cell and thalassemia                                        | D56, D57                                                                                                |
| Any transplant                                                     | Z94, T86                                                                                                |
| Substance abuse                                                    | F11 to F16, F18, F19, R78                                                                               |
| Tuberculosis                                                       | A15, A17 to A19                                                                                         |
| Long term steroid or immunomodulators                              | Z92.241, Z92.25, Z79.52                                                                                 |

|                                                   |                                                                                                                         |
|---------------------------------------------------|-------------------------------------------------------------------------------------------------------------------------|
| Liver disease                                     | B18.x, I85.x, I86.4, I98.2, K70.x, K71.1, K71.3 - K71.5, K71.7, K72.x - K74.x, K76.0, K76.2 - K76.9, Z94.4              |
| Rheumatoid arthritis or collagen vascular disease | L94.0, L94.1, L94.3, M05.x, M06.x, M08.x, M12.0, M12.3, M30.x, M31.0 - M31.3, M32.x - M35.x, M45.x, M46.1, M46.8, M46.9 |
| Obstructive sleep apnea                           | G47.33                                                                                                                  |

Table S2: ICD-10 codes of complications

|                                     | ICD-10 codes                                                                                                                          |
|-------------------------------------|---------------------------------------------------------------------------------------------------------------------------------------|
| Severe sepsis                       | R65.20                                                                                                                                |
| Septic shock                        | R65.21                                                                                                                                |
| Acute kidney injury                 | N17                                                                                                                                   |
| Urinary filtration                  | 5A1D                                                                                                                                  |
| RBC transfusion                     | 30233N, 30243N, 30243P, 30233P                                                                                                        |
| Vasopressor need                    | 3E030XZ, 3E033XZ, 3E040XZ, 3E043XZ, 3E053XZ, 3E060XZ, 3E063XZ, 3E050XZ                                                                |
| Acute respiratory failure           | J96                                                                                                                                   |
| BIPAP/CPAP and HFNC^                | 5A09357, 5A09358, 5A0935A, 5A09457, 5A09458, 5A0945A, 5A09557, 5A09558, 5A0955A                                                       |
| Mechanical Ventilation              | 0BH17EZ, 0BH18EZ, 0BH13EZ                                                                                                             |
| Acute liver failure                 | K72.9, K72.0                                                                                                                          |
| Extracorporeal membrane oxygenation | 5A15                                                                                                                                  |
| Cardiac arrest                      | I46                                                                                                                                   |
| Composite complications             | Urinary filtration, acute liver failure, RBC transfusion, HFNC and BIPAP/CPAP, Mechanical ventilation, vasopressor use, septic shock. |
